# Supplementary material
Source: MDPI journal article supplement (https://www.mdpi.com/1996-1073/16/13/5222)
Supplement: s1 [file s1]

## Supplementary Material

# Biomass Based N/O Codoped Porous Carbons with Abundant Ultramicropores for Highly Selective CO<sub>2</sub> Adsorption

Congxiu Guo <sup>1</sup>, Ya Sun <sup>1</sup>, Hongyan Ren <sup>2</sup>, Bing Wang <sup>1,\*</sup>, Xili Tong <sup>3,\*</sup>, Xuhui Wang <sup>1</sup>, Yu Niu <sup>1</sup> and Jiao Wu <sup>1,\*</sup>

<sup>1</sup> School of Electric Power, Civil Engineering and Architecture, Shanxi University, Taiyuan 030006, China; guocongxu@sxu.edu.cn (C.G.); 17835342913@163.com (Y.S.); wangxuhui@sxu.edu.cn (X.W.); niuyu@sxu.edu.cn (Y.N.)

<sup>2</sup> Jinzhong College of Information, Taigu 030800, China; renhongyan@jzci.edu.cn

<sup>3</sup> State Key Laboratory of Coal Conversion, Institute of Coal Chemistry, Chinese Academy of Sciences, Taiyuan 030001, China

\* Correspondence: wangbing@sxu.edu.cn (B.W.); jiaow@sxu.edu.cn (J.W.); tongxili@sxicc.ac.cn (X.T.)

To calculate CO<sub>2</sub>/N<sub>2</sub> selectivity based on Henry's law, the adsorption isotherms of CO<sub>2</sub> and N<sub>2</sub> were fitted according to a simplified virial equation:

$$\ln p = \ln q + \frac{1}{T}a_0 + b_0 \quad (S1)$$

Where p is pressure (Pa), T is temperature (K), q is the amount of the adsorbed gas (mmol g<sup>-1</sup>), a<sub>0</sub> and b<sub>0</sub> are the virial coefficients. Then the Henry's constant (K<sub>H</sub>) can be obtained based on equation (S2):

$$K_H = \exp\left(-\frac{a_0}{T}\right) \exp(b_0) \quad (S2)$$

Finally, the CO<sub>2</sub>/N<sub>2</sub> selectivity by Henry's law can be calculated *via* exploiting the following equation (S3):

$$S_{CO_2/N_2} = K_{H,CO_2}/K_{H,N_2} \quad (S3)$$

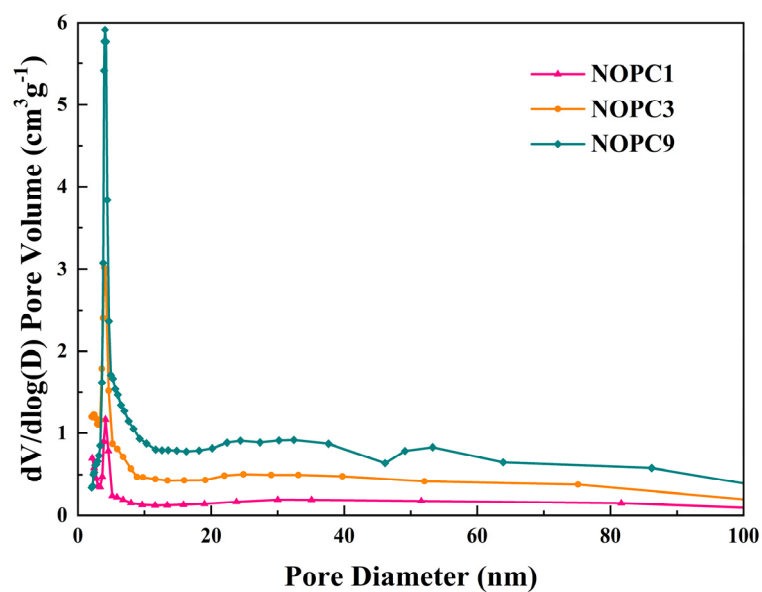

**Figure S1.** Pore size distribution curves of NOPC1, NOPC3 and NOPC9.

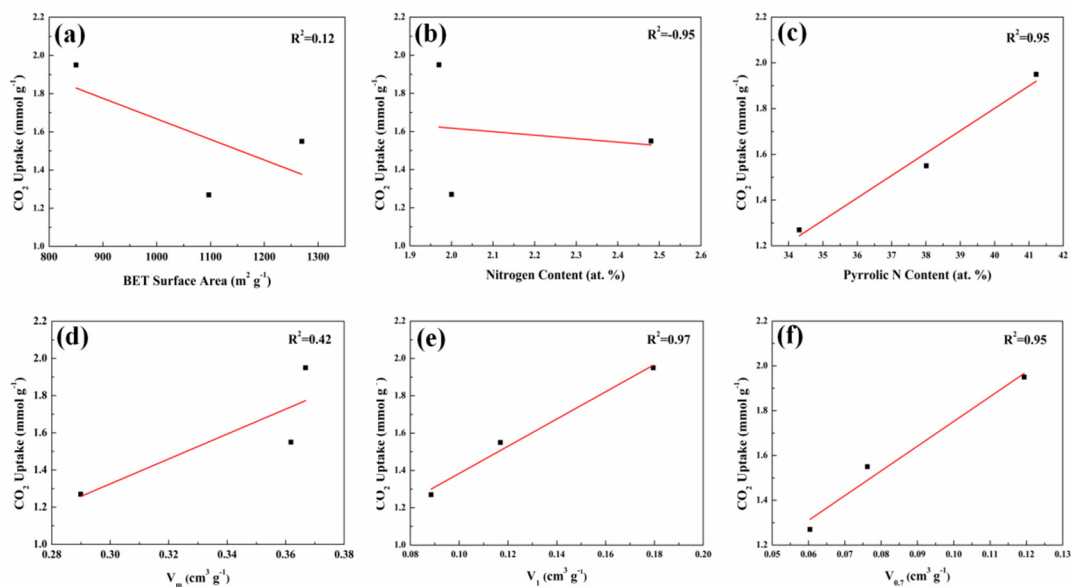

**Figure S2.** The linear fitting of CO<sub>2</sub> uptake (298 K, 1bar) against (a) BET surface area, (b) Nitrogen content, (c) Pyrrolic N content, (d)  $V_m$ , (e)  $V_1$  and (f)  $V_{0.7}$ .

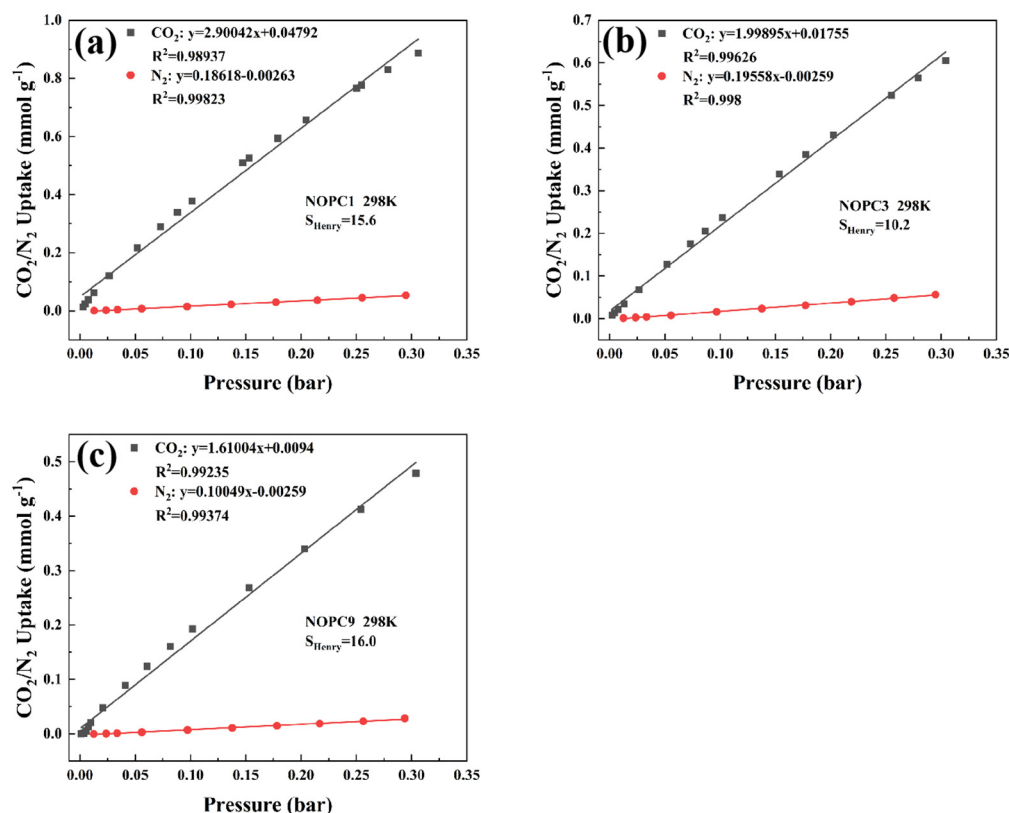

**Figure S3.** The  $\text{CO}_2/\text{N}_2$  selectivity by Henry's law on NOPC1 (a), NOPC3 (b) and NOPC9 (c) at 298 K.

**Table S1.** The elemental composition of NOPCs analyzed by EA.

| Sample | Element content (wt%) |       |        |      |
|--------|-----------------------|-------|--------|------|
|        | C                     | H     | O      | N    |
| NOPC0  | 86.47                 | 1.555 | 8.475  | 2.94 |
| NOPC1  | 88.15                 | 1.423 | 8.000  | 2.26 |
| NOPC3  | 85.00                 | 1.587 | 10.215 | 2.65 |
| NOPC9  | 85.52                 | 1.365 | 10.442 | 2.00 |

**Table S2** The surface elemental composition of NOPCs calculated by XPS results.

| Sample | Atomic % |      |       |      |
|--------|----------|------|-------|------|
|        | C 1s     | N 1s | O 1s  | P 2p |
| NOPC0  | 83.99    | 2.66 | 12.01 | 1.35 |
| NOPC1  | 93.39    | 1.97 | 4.21  | 0.43 |
| NOPC3  | 92.53    | 2.48 | 4.58  | 0.41 |
| NOPC9  | 91.96    | 2    | 5.59  | 0.45 |
